# Supplementary material
Source: MDPI journal article supplement (https://www.mdpi.com/2073-445X/10/4/340)
Supplement: s1 [file s1]

This questionnaire has been prepared to obtain data for a scientific research. Your name and address will not be required. We should therefore be most grateful if you would complete this questionnaire.

Thank you for your interest and assistance.

Questionnaire No:

Date:

**1. Sex?**

☐ Female ☐ Male

**2. How old are you?**

☐ 18-23 ☐ 24-29 ☐ More than 30

**3. What is your educational status?**

☐ Noneducated ☐ Primary school ☐ Middle school  
☐ High school ☐ University ☐ Post-graduate education

**4. What is your profession?**

☐ Architect/Engineer ☐ Student ☐ Other.....

**5. How often do you use the overpass?**

☐ Rarely ☐ 1-2 times per month ☐ Everyday  
☐ Frequently ☐ 1-2 times per week ☐ 2-3 times per week

**6. Where would you use the overpass to go to?**

☐ To go the coast ☐ To go the city center ☐ To go home  
☐ To go the hospital ☐ To go to the university

**7. What is the reason you prefer the overpass?**

☐ For security ☐ There is no alternative ☐ It's a convenient route  
☐ It's the way to the coast ☐ It's the way to the parking lot

**8. Do you remember the initial version of the overpass?**

☐ Yes ☐ No

**9. What does the overpass mean to you from past to present?**

☐ Walking ☐ Nothing  
☐ Riding a bicycle ☐ Sitting/Observing Having fun

**10. Do you find the overpass safe?**

☐ Yes ☐ No

**11. How would you like to spend time in an area without vehicle traffic?**

☐ Walking ☐ I don't know  
☐ Riding a bicycle ☐ Sitting/Observing Having fun

**12. Evaluate the overpass by scoring the criteria (opposite adjective pairs) given in the table.**

| Criteria       | 1 | 2 | 3 | 4 | 5 | 6 | 7 | Criteria      |
|----------------|---|---|---|---|---|---|---|---------------|
| Dysfunctional  |   |   |   |   |   |   |   | Functional    |
| Irregular      |   |   |   |   |   |   |   | Regular       |
| Not aesthetic  |   |   |   |   |   |   |   | Aesthetic     |
| Not attractive |   |   |   |   |   |   |   | Attractive    |
| Ordinary       |   |   |   |   |   |   |   | Private       |
| Forgettable    |   |   |   |   |   |   |   | Unforgettable |
| Insecure       |   |   |   |   |   |   |   | Secure        |

1: dysfunctional

2: somewhat dysfunctional

3: minimally dysfunctional

4: average

5: minimally functional

6: somewhat functional

7: functional
